# Supplementary material for: The Imbalance of Circulating Follicular T Helper Cell Subsets in Primary Sjögren’s Syndrome Associates With Serological Alterations and Abnormal B-Cell Distribution
Source: PubMed Central journal article supplement (PMC8018236; doi:10.3389/fimmu.2021.639975), 2021-03-19
Supplement: DataSheet_1.pdf [file DataSheet_1.pdf]

*Supplementary Material*

**The imbalance of circulating follicular T helper cell subsets in primary Sjögren's syndrome associates with serological alterations and abnormal B-cell distribution**

**Krisztina Szabó<sup>1\*†</sup>, Ilona Jámbo<sup>1†</sup>, Antónia Szántó<sup>1</sup>, Ildikó Fanny Horváth<sup>1</sup>, Tünde Tarr<sup>1</sup>, Britt Nakken<sup>2</sup>, Peter Szodoray<sup>2</sup> and Gábor Papp<sup>1</sup>**

<sup>1</sup>Division of Clinical Immunology, Faculty of Medicine, University of Debrecen, Debrecen, Hungary

<sup>2</sup>Department of Immunology, Oslo University Hospital, Rikshospitalet, and K.G. Jebsen Center for B cell malignancies, University of Oslo, Oslo, Norway

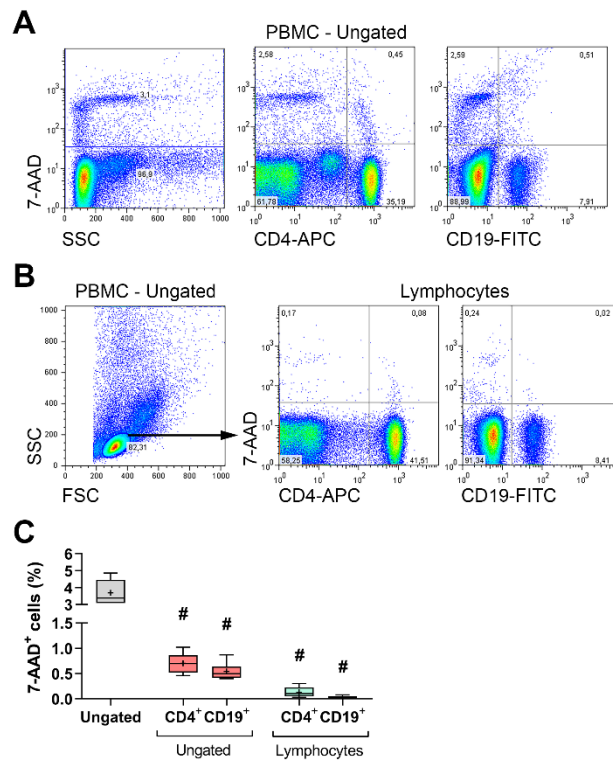

**Supplementary Figure 1. Assessment of cell viability using 7-Aminoactinomycin D (7-AAD) staining in fresh PBMC samples.** PBMCs were isolated from healthy controls (HC,  $n = 6$ ) then cells were stained with anti-CD4-APC, anti-CD19-FITC fluorochrome-labelled antibodies and 7-AAD viability solution as described previously. Cells were assessed using FACS Calibur flow cytometer and further analyzed with FlowJo software. **(A)** Representative dot plots indicate the gating strategy and determination of viable cells within total PBMCs. **(B)** Representative dot plots indicate the gating strategy and determination of viable cells within lymphocytes. **(C)** Percentages of 7-AAD<sup>+</sup> cells, CD4<sup>+</sup>7-AAD<sup>+</sup> cells and lymphocytes, CD19<sup>+</sup>7-AAD<sup>+</sup> cells and lymphocytes. One-way ANOVA with Tukey's multiple comparisons test was used for data analysis. Box plots represent the interquartile range (IQR) with a line in the middle as median and “+” sign as the mean value. Statistically significant differences are indicated by #  $p < 0.0001$ .

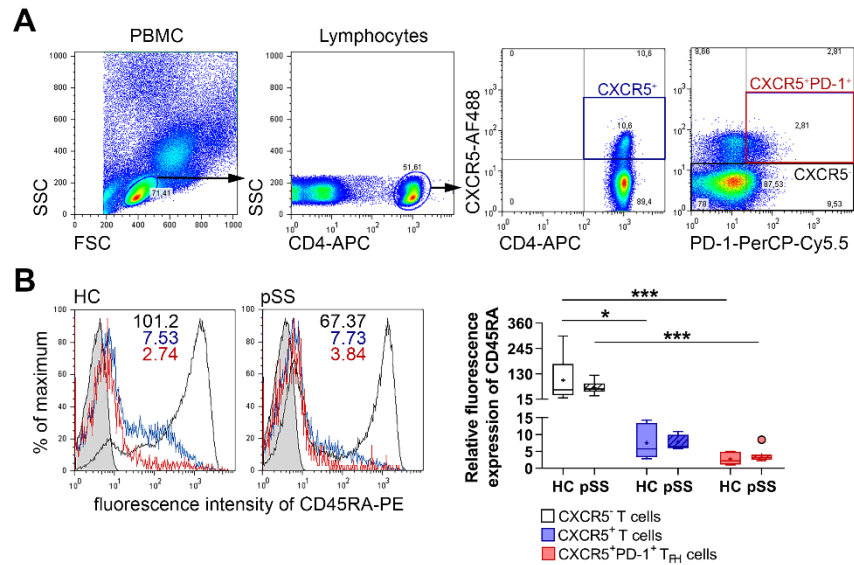

**Supplementary Figure 2. Evaluation of the relative fluorescence expression of CD45RA on circulating CXCR5<sup>-</sup> T cells, CD4<sup>+</sup>CXCR5<sup>+</sup> and CD4<sup>+</sup>CXCR5<sup>+</sup>PD-1<sup>+</sup> T cells.** PBMCs were isolated from patients with pSS (n = 7) and healthy controls (HC, n = 6) then cells were stained with anti-CXCR5-AF488, anti-CD45RA-PE, anti-PD-1-PerCP-Cy5.5 and anti-CD4-APC fluorochrome-labelled monoclonal antibodies as described previously. Cells were analyzed using FACS Calibur flow cytometer and further examined with FlowJo software. **(A)** Representative dot plots show the gating strategy of T cell subsets. **(B)** Representative histograms display the expression of CD45RA in CXCR5<sup>-</sup> T cells (black), CD4<sup>+</sup>CXCR5<sup>+</sup> (blue) and CD4<sup>+</sup>CXCR5<sup>+</sup>PD-1<sup>+</sup> (red) T cells. Relative fluorescence expression of CD45RA. Kruskal-Wallis test with Dunn's multiple comparisons test was used for statistical analysis. Box plots represent the interquartile range (IQR) with a line in the middle as median and “+” sign as the mean value. Statistically significant differences are indicated by \* $p < 0.05$ ; \*\*\* $p < 0.001$ .

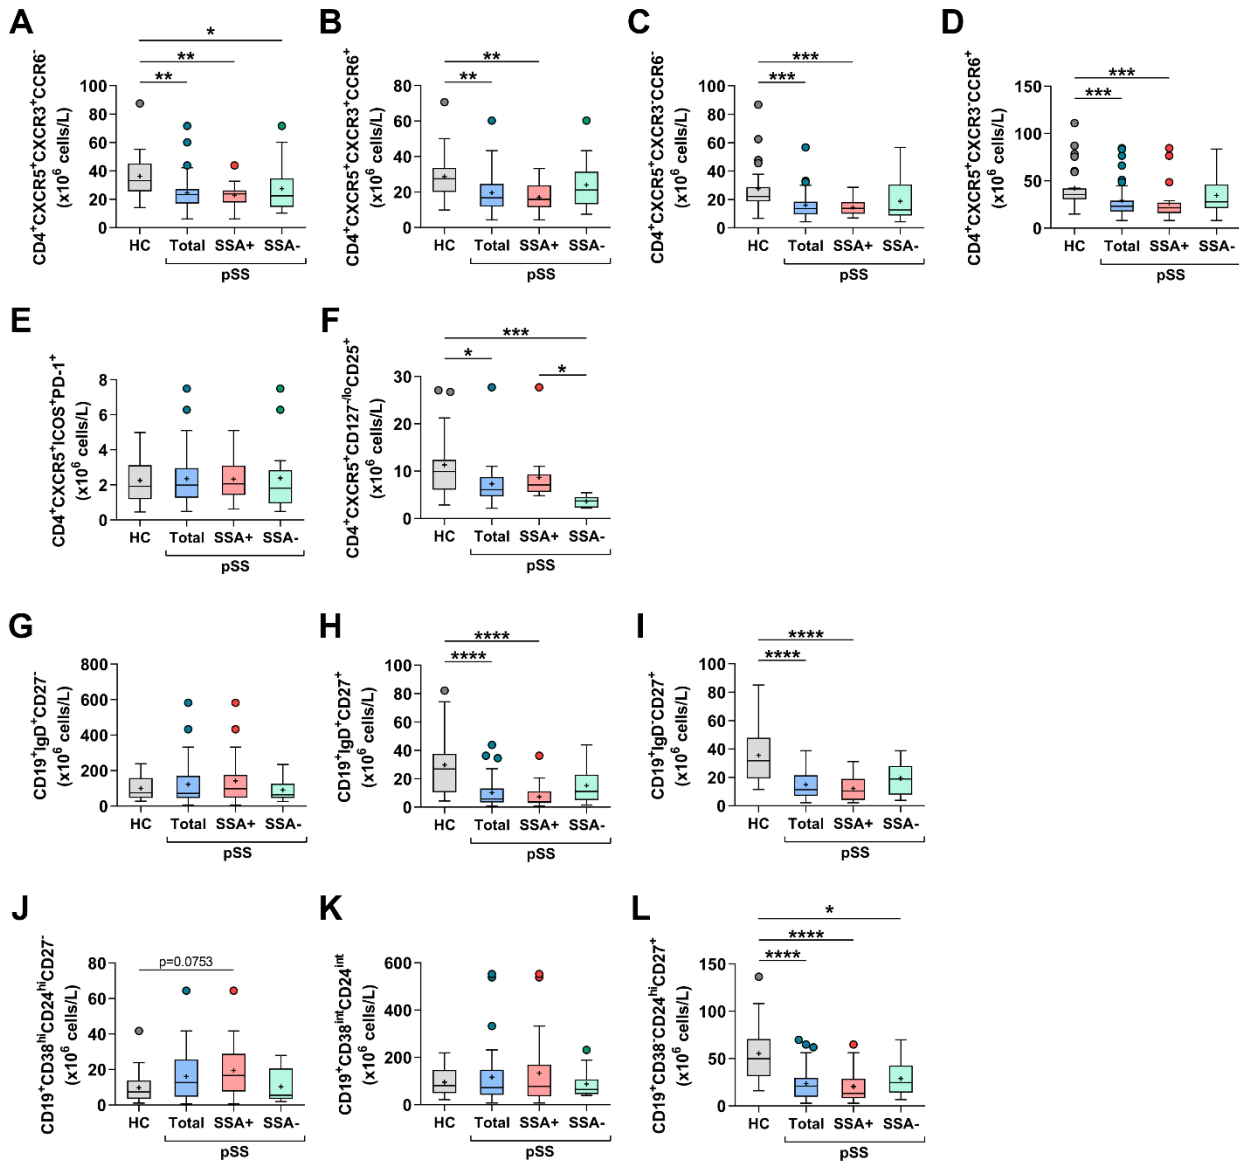

**Supplementary Figure 3. Abnormal distribution of the absolute numbers of cT<sub>FH</sub> subsets, cT<sub>FR</sub> cells and different B cell subsets.** The absolute numbers of (A) cT<sub>FH</sub>1, (B) cT<sub>FH</sub>1/17, (C) cT<sub>FH</sub>2, (D) cT<sub>FH</sub>17, (E) activated cT<sub>FH</sub>, (F) cT<sub>FR</sub>, (G) IgD<sup>+</sup>CD27<sup>-</sup> naive B cells, (H) IgD<sup>+</sup>CD27<sup>+</sup> non-switched memory B cells, (I) IgD<sup>+</sup>CD27<sup>+</sup> switched memory B cells, (J) CD38<sup>hi</sup>CD24<sup>hi</sup>CD27<sup>-</sup> transitional B cells, (K) CD38<sup>+</sup>CD24<sup>+</sup> mature-naive B cells, (L) CD38<sup>+</sup>CD24<sup>hi</sup>CD27<sup>+</sup> primarily memory B cells in pSS patients (n = 38), pSS without anti-SSA(-) (n = 14) and pSS with anti-SSA(+) (n = 24) and healthy controls (HC; n=29). Data analysis were performed using one-way ANOVA with Tukey's multiple comparisons test or Kruskal-Wallis test with Dunn's multiple comparisons test. Correlation analysis was carried out with Spearman's test. Box plots represent the interquartile range (IQR) with a line in the middle as median and "+" sign as the mean value. Statistically significant differences are indicated by \**p* < 0.05; \*\**p* < 0.01; \*\*\**p* < 0.001; \*\*\*\**p* < 0.0001.

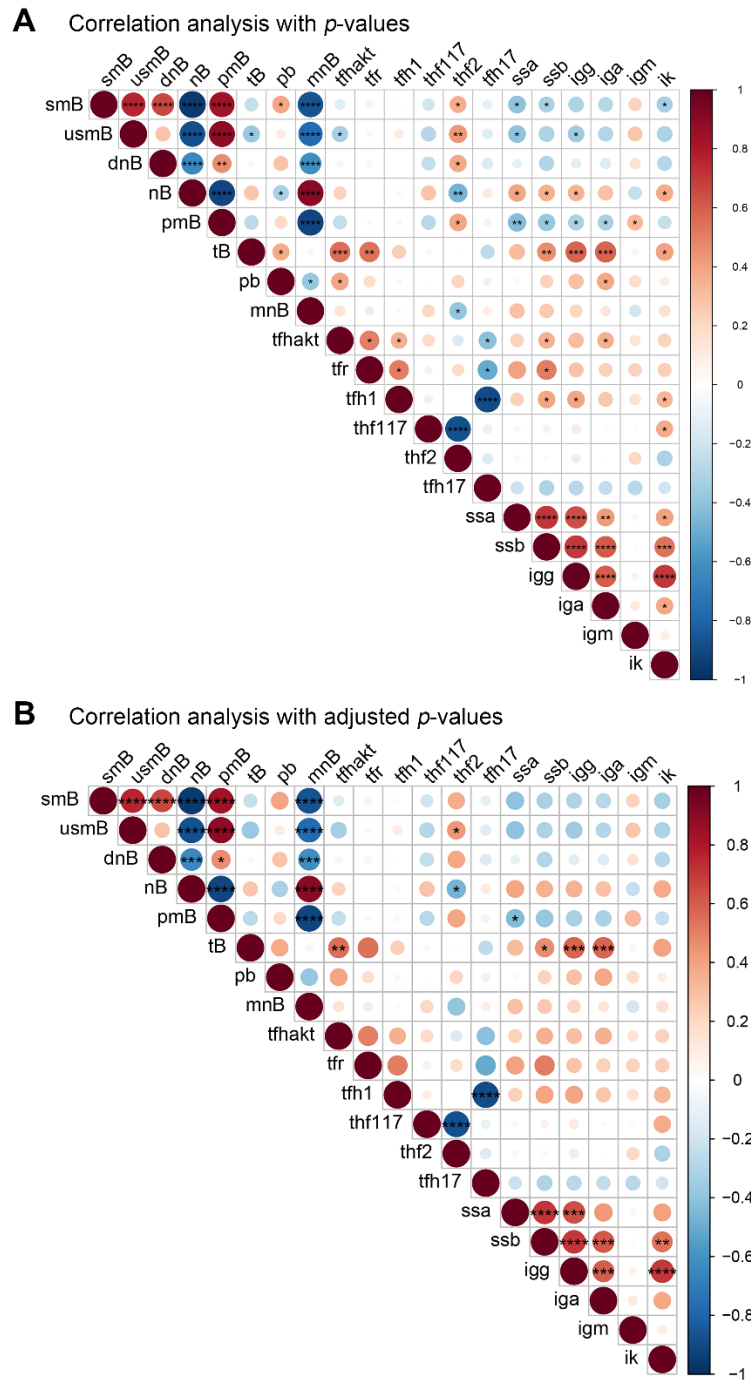

**Supplementary Figure 4.** Correlation analysis of the percentages of  $T_{FH}$  cell subsets,  $T_{FR}$  cells, B cell subsets and serological parameters in patients with pSS. Statistics and visualization of the correlation matrices were done with the R software, using the Hmisc and Corrplot packages. Spearman's correlation analysis were used for the correlations between the percentages of cell subsets and serological parameters and R-values were obtained using Corrplot function. **(A)** Correlation analysis with  $p$ -values and **(B)** adjusted  $p$ -values.
